# Supplementary material for: Exploring the Climatic Niche Evolution of the Genus Falco (Aves: Falconidae) in Europe
Source: MDPI journal article supplement (doi:10.3390/biology13020113), 2024-02-11
Supplement: s1 [file s1]

## Supplementary Material

### Exploring the climatic niche evolution of the genus *Falco* (Aves: Falconidae) in Europe

Simona Mariana Popescu, Cristian Tigae, Aurelian Dobrițescu, Dragoș Mihail Ștefănescu \*

\* **Correspondence:** dragos.stefanescu@edu.ucv.ro

#### Supplementary Figures and Tables

**Table S1.** List of WorldClim' bioclimatic variables used in this study. In bold, variables retained for further analyses after controlling for collinearity

| Variable                                                                                             | Abbrev. |
|------------------------------------------------------------------------------------------------------|---------|
| <b>Annual mean temperature (°C)</b>                                                                  | Bio 1   |
| <b>Annual mean diurnal range (mean of the monthly temperature ranges (max temp – min temp)) (°C)</b> | Bio 2   |
| Isothermality ((Bio 2/Bio 7) * 100) (%)                                                              | Bio 3   |
| Temperature seasonality (standard deviation * 100) (°C)                                              | Bio 4   |
| Maximum temperature of warmest month (°C)                                                            | Bio 5   |
| Minimum temperature of coldest month (°C)                                                            | Bio 6   |
| <b>Temperature annual range (Bio 5 – Bio 6) (°C)</b>                                                 | Bio 7   |
| <b>Mean temperature of wettest quarter (°C)</b>                                                      | Bio 8   |
| Mean temperature of driest quarter (°C)                                                              | Bio 9   |
| Mean temperature of warmest quarter (°C)                                                             | Bio 10  |
| Mean temperature of coldest quarter (°C)                                                             | Bio 11  |
| Annual precipitation (mm)                                                                            | Bio 12  |
| Precipitation of wettest month (mm)                                                                  | Bio 13  |
| Precipitation of driest month (mm)                                                                   | Bio 14  |
| <b>Precipitation seasonality (standard deviation * 100)</b>                                          | Bio 15  |
| Precipitation of wettest quarter (mm)                                                                | Bio 16  |
| Precipitation of driest quarter (mm)                                                                 | Bio 17  |
| <b>Precipitation of warmest quarter (mm)</b>                                                         | Bio 18  |
| <b>Precipitation of coldest quarter (mm)</b>                                                         | Bio 19  |

**Table S2.** Median climatic values extracted from the species occurrence points, for each climatic variable

| Species                 | Variable |        |        |        |        |         |         |
|-------------------------|----------|--------|--------|--------|--------|---------|---------|
|                         | Bio1     | Bio2   | Bio7   | Bio8   | Bio15  | Bio18   | Bio19   |
| <i>F. biarmicus</i>     | 13.591   | 8.665  | 25.882 | 11.090 | 31.197 | 95.000  | 188.000 |
| <i>F. cherrug</i>       | 9.469    | 9.492  | 30.826 | 18.289 | 26.568 | 190.000 | 112.000 |
| <i>F. columbarius</i>   | 2.474    | 7.698  | 30.911 | 10.790 | 30.078 | 218.500 | 131.000 |
| <i>F. eleonora</i>      | 14.753   | 9.195  | 25.183 | 12.581 | 36.000 | 95.000  | 178.000 |
| <i>F. naumanni</i>      | 14.727   | 10.896 | 28.391 | 10.239 | 48.940 | 55.000  | 207.000 |
| <i>F. peregrinus</i>    | 10.741   | 9.132  | 26.429 | 10.420 | 29.862 | 163.000 | 194.000 |
| <i>F. rusticolus</i>    | 1.200    | 6.658  | 22.419 | 7.206  | 25.048 | 206.500 | 168.500 |
| <i>F. subbuteo</i>      | 9.365    | 8.617  | 27.657 | 13.027 | 27.899 | 193.000 | 151.000 |
| <i>F. tinnunculus</i>   | 9.552    | 8.737  | 27.380 | 11.864 | 28.893 | 188.000 | 164.000 |
| <i>F. vespertinus</i>   | 10.927   | 9.765  | 30.457 | 16.229 | 29.713 | 158.500 | 121.000 |
| Mean climatic tolerance | 9.679    | 8.885  | 27.553 | 12.173 | 31.419 | 156.250 | 161.450 |

**Table S3.** Weighted means of the predicted niche occupancy (PNO) for all falcon species and for all bioclimatic variable included in our analyses

| Species                 | Variable |        |        |        |        |         |         |
|-------------------------|----------|--------|--------|--------|--------|---------|---------|
|                         | Bio 1    | Bio 2  | Bio 7  | Bio 8  | Bio 15 | Bio 18  | Bio 19  |
| <i>F. biarmicus</i>     | 11.868   | 9.328  | 26.981 | 10.384 | 35.768 | 124.127 | 201.675 |
| <i>F. cherrug</i>       | 8.471    | 9.121  | 30.904 | 17.493 | 30.017 | 206.460 | 114.452 |
| <i>F. columbarius</i>   | 3.787    | 7.676  | 28.729 | 10.247 | 28.694 | 222.621 | 167.221 |
| <i>F. eleonora</i>      | 12.215   | 9.436  | 27.264 | 12.112 | 36.235 | 123.136 | 187.170 |
| <i>F. naumanni</i>      | 13.141   | 10.291 | 28.010 | 10.224 | 42.341 | 86.078  | 201.310 |
| <i>F. peregrinus</i>    | 9.023    | 8.875  | 27.647 | 11.836 | 30.176 | 181.576 | 175.501 |
| <i>F. rusticolus</i>    | 2.847    | 7.486  | 27.797 | 8.394  | 27.702 | 216.300 | 174.833 |
| <i>F. subbuteo</i>      | 8.345    | 8.745  | 28.372 | 13.520 | 28.110 | 196.811 | 152.977 |
| <i>F. tinnunculus</i>   | 8.488    | 8.787  | 28.246 | 12.847 | 29.285 | 189.806 | 159.942 |
| <i>F. vespertinus</i>   | 9.679    | 9.311  | 29.324 | 14.477 | 31.527 | 173.503 | 144.747 |
| Mean climatic tolerance | 8.787    | 8.906  | 28.327 | 12.153 | 31.985 | 172.041 | 167.982 |

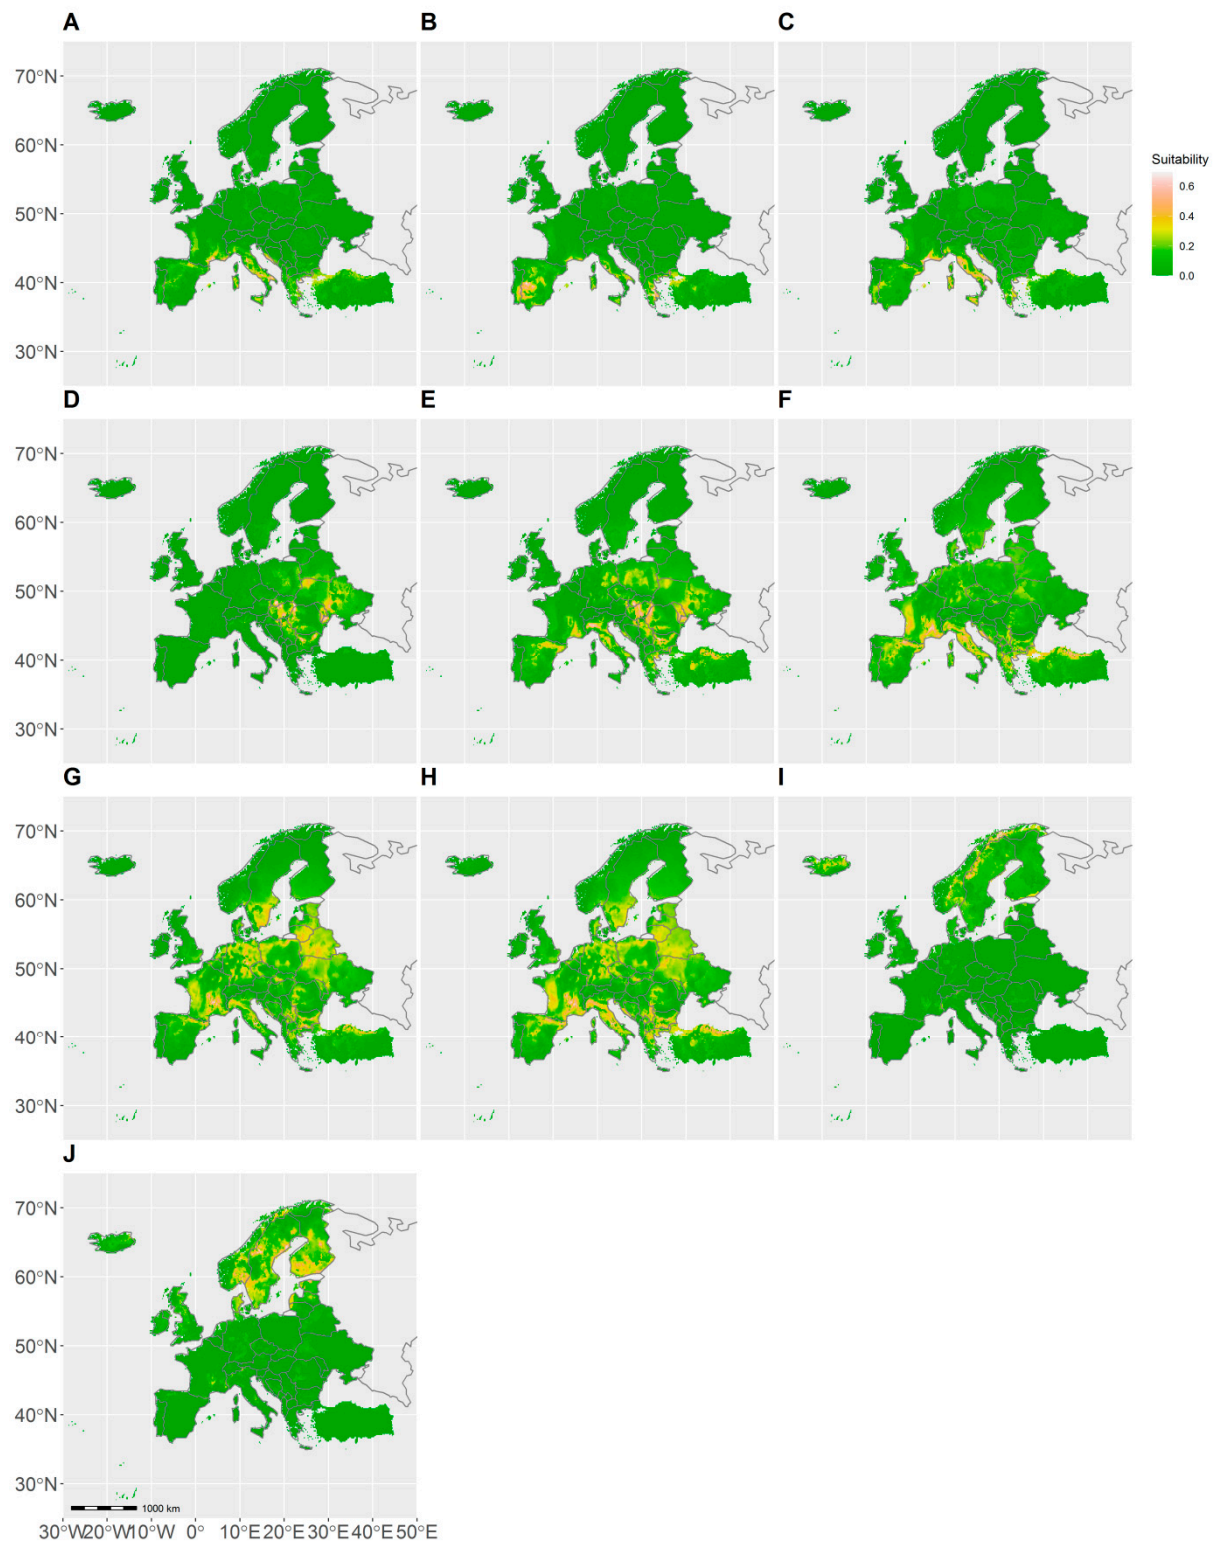

**Figure S1.** Predicted falcon species distribution in Europe based on Bioclim algorithm: *Falco biarmicus* (A); *Falco naumanni* (B); *Falco eleonora* (C); *Falco cherrug* (D); *Falco vespertinus* (E); *Falco peregrinus* (F); *Falco subbuteo* (G); *Falco tinnunculus* (H); *Falco rusticolus* (I), and *Falco columbarius* (J). According to legend, warmer colours indicate a higher probability of species occurrence.

**Table S4.** Niche overlap among falcon species in geographic space based on Schoener's  $D$  metric

[illegible]

**Table S5.** Niche overlap, niche equivalency and similarity test for falcon clade, according to Broennimann et al. (2012) approach. Lower values of  $D$  (equivalency/similarity test, with significant values in bold when  $p < 0.05$ ) indicating niche divergence (the niche overlap is less equivalent/similar than random), and greater value (equivalency/similarity test, with significant values in bold when  $p < 0.05$ ) indicating niche conservatism (the niche overlap is more equivalent/similar than random)

| Species 1            | Species 2            | Niche overlap ( $D$ ) | Niche equivalency test       |                          | Niche similarity test        |                       |                          |                       |
|----------------------|----------------------|-----------------------|------------------------------|--------------------------|------------------------------|-----------------------|--------------------------|-----------------------|
|                      |                      |                       | Niche conservatism (greater) | Niche divergence (lower) | Niche conservatism (greater) |                       | Niche divergence (lower) |                       |
|                      |                      |                       | p-value for $D$              | p-value for $D$          | p-value for $D$ (1-2)        | p-value for $D$ (2-1) | p-value for $D$ (1-2)    | p-value for $D$ (2-1) |
| <i>F.columbarius</i> | <i>F.biarmicus</i>   | 0.060                 | 1.000                        | 0.009                    | 0.591                        | 0.576                 | 0.407                    | 0.4025                |
|                      | <i>F.cherrug</i>     | 0.137                 | 1.000                        | 0.009                    | 0.542                        | 0.311                 | 0.441                    | 0.683                 |
|                      | <i>F.eleonorae</i>   | 0.041                 | 1.000                        | 0.009                    | 0.329                        | 0.528                 | 0.719                    | 0.469                 |
|                      | <i>F.naumanni</i>    | 0.040                 | 1.000                        | 0.009                    | 0.908                        | 0.332                 | 0.071                    | 0.678                 |
|                      | <i>F.peregrinus</i>  | 0.245                 | 1.000                        | 0.009                    | 0.338                        | 0.002                 | 0.662                    | 1.000                 |
|                      | <i>F.rusticolus</i>  | 0.414                 | 0.990                        | 0.019                    | 0.022                        | 0.068                 | 0.980                    | 0.926                 |
|                      | <i>F.subbuteo</i>    | 0.287                 | 0.980                        | 0.029                    | 0.316                        | 0.119                 | 0.713                    | 0.896                 |
|                      | <i>F.tinnunculus</i> | 0.298                 | 0.534                        | 0.465                    | 0.297                        | 0.018                 | 0.709                    | 0.985                 |

|                    |                      |       |       |       |       |       |       |       |
|--------------------|----------------------|-------|-------|-------|-------|-------|-------|-------|
|                    | <i>F.vespertinus</i> | 0.179 | 0.950 | 0.108 | 0.394 | 0.135 | 0.590 | 0.872 |
| <i>F.biarmicus</i> | <i>F.cherrug</i>     | 0.065 | 1.000 | 0.009 | 0.439 | 0.493 | 0.529 | 0.519 |
|                    | <i>F.eleonorae</i>   | 0.683 | 0.198 | 0.821 | 0.005 | 0.014 | 0.993 | 0.990 |
|                    | <i>F.naumanni</i>    | 0.556 | 0.207 | 0.742 | 0.042 | 0.105 | 0.965 | 0.893 |
|                    | <i>F.peregrinus</i>  | 0.382 | 0.415 | 0.504 | 0.020 | 0.035 | 0.980 | 0.969 |
|                    | <i>F.rusticolus</i>  | 0.111 | 1.000 | 0.009 | 0.303 | 0.440 | 0.694 | 0.569 |
|                    | <i>F.subbuteo</i>    | 0.406 | 0.049 | 0.980 | 0.050 | 0.043 | 0.950 | 0.958 |
|                    | <i>F.tinnunculus</i> | 0.358 | 0.396 | 0.554 | 0.037 | 0.019 | 0.972 | 0.986 |
|                    | <i>F.vespertinus</i> | 0.527 | 0.019 | 1.000 | 0.140 | 0.091 | 0.860 | 0.912 |
| <i>F.cherrug</i>   | <i>F.eleonorae</i>   | 0.155 | 1.000 | 0.019 | 0.187 | 0.212 | 0.820 | 0.803 |
|                    | <i>F.naumanni</i>    | 0.025 | 1.000 | 0.009 | 0.661 | 0.316 | 0.323 | 0.632 |
|                    | <i>F.peregrinus</i>  | 0.031 | 1.000 | 0.009 | 0.262 | 0.434 | 0.732 | 0.577 |
|                    | <i>F.rusticolus</i>  | 0.095 | 1.000 | 0.009 | 0.693 | 0.694 | 0.299 | 0.324 |
|                    | <i>F.subbuteo</i>    | 0.090 | 1.000 | 0.009 | 0.094 | 0.319 | 0.889 | 0.706 |
|                    | <i>F.tinnunculus</i> | 0.060 | 1.000 | 0.009 | 0.062 | 0.289 | 0.947 | 0.724 |

|                     |                      |       |       |       |       |       |       |       |
|---------------------|----------------------|-------|-------|-------|-------|-------|-------|-------|
|                     | <i>F.vespertinus</i> | 0.156 | 1.000 | 0.009 | 0.005 | 0.248 | 0.994 | 0.749 |
| <i>F.eleonorae</i>  | <i>F.naumanni</i>    | 0.448 | 1.000 | 0.019 | 0.116 | 0.480 | 0.876 | 0.580 |
|                     | <i>F.peregrinus</i>  | 0.364 | 0.712 | 0.267 | 0.029 | 0.018 | 0.965 | 0.976 |
|                     | <i>F.rusticolus</i>  | 0.086 | 1.000 | 0.009 | 0.509 | 0.278 | 0.483 | 0.768 |
|                     | <i>F.subbuteo</i>    | 0.395 | 0.009 | 1.000 | 0.099 | 0.006 | 0.907 | 0.996 |
|                     | <i>F.tinnunculus</i> | 0.326 | 0.445 | 0.504 | 0.024 | 0.004 | 0.976 | 0.999 |
|                     | <i>F.vespertinus</i> | 0.492 | 0.049 | 0.950 | 0.176 | 0.061 | 0.839 | 0.926 |
| <i>F.naumanni</i>   | <i>F.peregrinus</i>  | 0.448 | 0.089 | 0.940 | 0.091 | 0.079 | 0.916 | 0.917 |
|                     | <i>F.rusticolus</i>  | 0.026 | 1.000 | 0.009 | 0.487 | 0.893 | 0.528 | 0.112 |
|                     | <i>F.subbuteo</i>    | 0.392 | 0.009 | 1.000 | 0.125 | 0.191 | 0.867 | 0.807 |
|                     | <i>F.tinnunculus</i> | 0.428 | 0.009 | 1.000 | 0.023 | 0.057 | 0.984 | 0.935 |
|                     | <i>F.vespertinus</i> | 0.540 | 0.009 | 1.000 | 0.039 | 0.047 | 0.963 | 0.959 |
| <i>F.peregrinus</i> | <i>F.rusticolus</i>  | 0.108 | 1.000 | 0.009 | 0.170 | 0.278 | 0.847 | 0.703 |
|                     | <i>F.subbuteo</i>    | 0.719 | 1.000 | 0.009 | 0.008 | 0.013 | 0.992 | 0.990 |
|                     | <i>F.tinnunculus</i> | 0.846 | 0.554 | 0.306 | 0.001 | 0.004 | 1.000 | 1.000 |

|                      |                      |       |       |       |       |       |       |       |
|----------------------|----------------------|-------|-------|-------|-------|-------|-------|-------|
|                      | <i>F.vespertinus</i> | 0.486 | 1.000 | 0.009 | 0.182 | 0.063 | 0.817 | 0.912 |
| <i>F.rusticolus</i>  | <i>F.subbuteo</i>    | 0.263 | 0.821 | 0.168 | 0.266 | 0.031 | 0.770 | 0.958 |
|                      | <i>F.tinnunculus</i> | 0.164 | 1.000 | 0.009 | 0.332 | 0.088 | 0.693 | 0.924 |
|                      | <i>F.vespertinus</i> | 0.113 | 0.980 | 0.019 | 0.475 | 0.249 | 0.494 | 0.740 |
| <i>F.subbuteo</i>    | <i>F.tinnunculus</i> | 0.732 | 1.000 | 0.009 | 0.017 | 0.008 | 0.991 | 0.997 |
|                      | <i>F.vespertinus</i> | 0.548 | 0.217 | 0.762 | 0.208 | 0.073 | 0.768 | 0.922 |
| <i>F.tinnunculus</i> | <i>F.vespertinus</i> | 0.524 | 0.178 | 0.881 | 0.084 | 0.049 | 0.940 | 0.966 |



**Table S6.** Loadings of phylogenetic principal components analysis of climatic axes

| Variable                                    | PC1    | PC2    |
|---------------------------------------------|--------|--------|
| annual mean temperature (Bio 1)             | -0.845 | -0.504 |
| annual mean diurnal range (Bio 2)           | -0.719 | -0.687 |
| annual temperature range (Bio 7)            | 0.426  | -0.885 |
| mean temperature of wettest quarter (Bio 8) | 0.132  | -0.986 |
| precipitation seasonality (Bio 15)          | -0.965 | -0.101 |
| precipitation of warmest quarter (Bio 18)   | 0.997  | -0.040 |
| precipitation of coldest quarter (Bio 19)   | -0.578 | 0.814  |

**Table S7.** Results of tests of phylogenetic signal for bioclimatic variables

| Bioclimatic variable | Pagel's $\lambda$ |             | Blomberg's $K$ |             | Moran's $I$ |             | Abouheif's $C_{\text{mean}}$ |             |
|----------------------|-------------------|-------------|----------------|-------------|-------------|-------------|------------------------------|-------------|
|                      | $\lambda$         | $p$ - value | $K$            | $p$ - value | $I$         | $p$ - value | $C_{\text{mean}}$            | $p$ - value |
| Bio1                 | 7.31605e-05       | 1           | 0.280          | 0.727       | -0.181      | 0.590       | 0.016                        | 0.440       |
| Bio2                 | 7.31605e-05       | 1           | 0.300          | 0.747       | -0.231      | 0.754       | -0.113                       | 0.513       |
| Bio7                 | 7.31605e-05       | 1           | 0.166          | 0.966       | -0.294      | 0.887       | -0.252                       | 0.931       |
| Bio8                 | 7.31605e-05       | 1           | 0.149          | 0.992       | -0.369      | 0.943       | -0.303                       | 0.969       |
| Bio15                | 7.31605e-05       | 1           | 0.392          | 0.550       | -0.321      | 0.921       | -0.170                       | 0.828       |
| Bio18                | 7.31605e-05       | 1           | 0.356          | 0.585       | -0.255      | 0.723       | -0.082                       | 0.619       |
| Bio19                | 7.31605e-05       | 1           | 0.193          | 0.947       | -0.369      | 0.945       | -0.303                       | 0.958       |

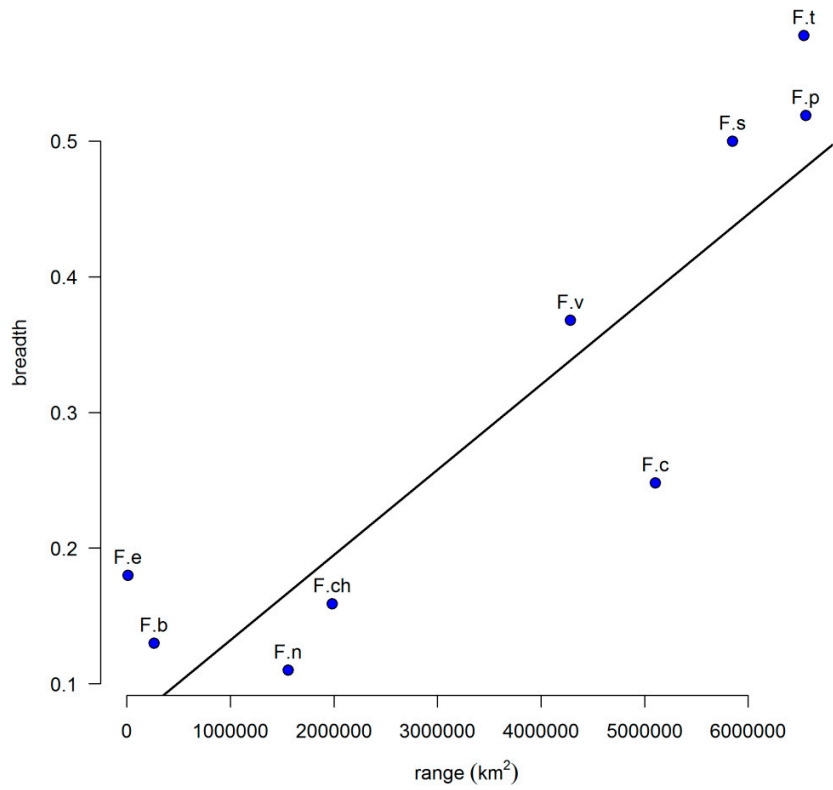

**Figure S2.** The relationship between range size and niche breadth for falcon species using Phylogenetic Generalized Least Squares (PGLS). Species names are indicated by first letter of the genus and the first letter of the species name, except for *F. cherrug*, in which case the name of the species is indicated with two letters (*F. ch*), in order to distinguish it from *F. columbarius* (*F.c*)

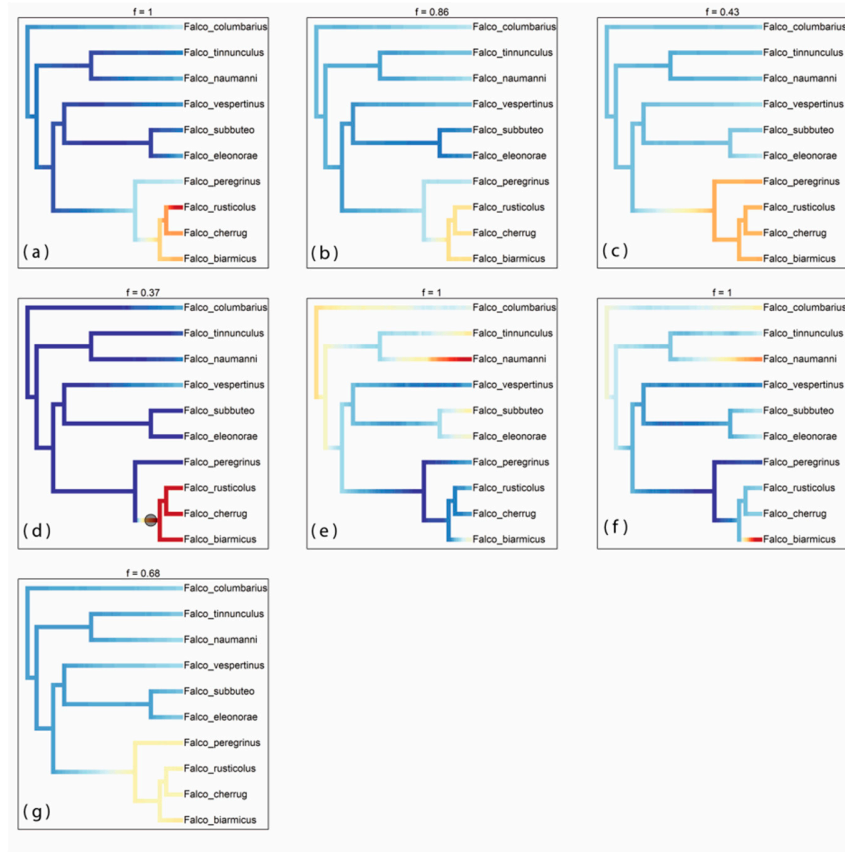

**Figure S3.** BMM phylorate plots showing rates of climatic niche evolution for genus *Falco* in Europe: (a) annual mean temperature, (b) annual mean diurnal range, (c) annual temperature range, (d) mean temperature of wettest quarter, (e) precipitation seasonality, (f) precipitation of warmest quarter, and (g) precipitation of coldest quarter. Branch colours indicate instantaneous rates, with warmer colour for faster rates. The grey circle depicts the rate shift point of climatic evolution detected by BMM analysis. For each climatic variable is plotted the distinct shift configuration with the highest posterior probability ( $f$ , indicated above each panel).
